# Supplementary material for: Structure-based classification predicts drug response in EGFR-mutant NSCLC
Source: PubMed Central journal article supplement (PMC8481125; doi:10.1038/s41586-021-03898-1), 2021-09-15
Supplement: 41586_2021_3898_MOESM1_ESM.pdf [file 41586_2021_3898_MOESM1_ESM.pdf]

---

**Supplementary information**

---

**Structure-based classification predicts drug response in *EGFR*-mutant NSCLC**

---

In the format provided by the authors and unedited

**Supplemental Table 1. Summary of compounds**

| EGFR TKI    | Class             | Primary Target | Binding      | Structure |
|-------------|-------------------|----------------|--------------|-----------|
| Erlotinib   | first-generation  | EGFR           | non-covalent |           |
| Gefitinib   | first-generation  | EGFR           | non-covalent |           |
| AZD3759     | first-generation  | EGFR           | non-covalent |           |
| Sapatinib   | first-generation  | EGFR           | non-covalent |           |
| Afatinib    | second-generation | EGFR           | covalent     |           |
| Dacomitinib | second-generation | EGFR           | covalent     |           |
| Neratinib   | second-generation | EGFR           | covalent     |           |
| Pozotinib   | second-generation | EGFR           | covalent     |           |

|              |                   |      |          |  |
|--------------|-------------------|------|----------|--|
| Tarlox-TKI   | second-generation | EGFR | covalent |  |
| CLN-081      | Ex20ins Active    | EGFR | covalent |  |
| AZ5104       | Ex20ins Active    | EGFR | covalent |  |
| Mobocertinib | Ex20ins Active    | EGFR | covalent |  |
| Osimertinib  | third-generation  | EGFR | covalent |  |
| Nazartinib   | third-generation  | EGFR | covalent |  |
| Olmutinib    | third-generation  | EGFR | covalent |  |
| Rociletinib  | third-generation  | EGFR | covalent |  |
| Naquotinib   | third-generation  | EGFR | covalent |  |

|               |                  |           |              |                                                                                      |
|---------------|------------------|-----------|--------------|--------------------------------------------------------------------------------------|
| Lazertinib    | third-generation | EGFR      | covalent     | 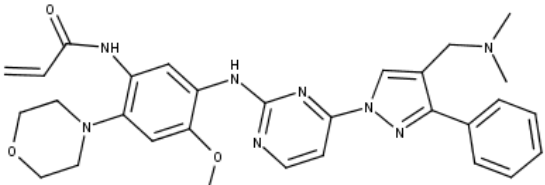   |
| Ruboxistaurin | PKC              | PKC       | non-covalent |   |
| Sotrastaurin  | PKC              | PKC       | non-covalent |   |
| Midostaurin   | PKC              | PKC       | non-covalent |   |
| CUDC-101      | EGFR/HDAC        | EGFR/HDAC | non-covalent |   |
| Brigatinib    | ALK              | ALK       | non-covalent |  |
| AZD3463       | ALK              | ALK       | non-covalent |  |

**Supplemental Table 2. Summary of variable importance determined by CART including T790M-like mutations**

| <b>Summary of variable importance</b> |                                 |                         |
|---------------------------------------|---------------------------------|-------------------------|
| <b>Drug</b>                           | <b>Structure function group</b> | <b>Exon-based group</b> |
| Erlotinib                             | 78                              | 22                      |
| Gefitinib                             | 90                              | 11                      |
| AZD3759                               | 77                              | 23                      |
| Sapatinib                             | 77                              | 23                      |
| Afatinib                              | 75                              | 25                      |
| Dacomitinib                           | 75                              | 25                      |
| Neratinib                             | 66                              | 34                      |
| Pozotinib                             | 94                              | 6                       |
| Tarlox-TKI                            | 79                              | 21                      |
| CLN-081                               | 91                              | 9                       |
| AZ5104                                | 91                              | 9                       |
| Mobocertinib                          | 90                              | 10                      |
| Osimertinib                           | 87                              | 14                      |
| Nazartinib                            | 82                              | 18                      |
| Olmutinib                             | 89                              | 11                      |
| Rociletinib                           | 85                              | 15                      |
| Naquotinib                            | 78                              | 22                      |
| Lazertinib                            | 91                              | 9                       |

**Supplemental Table 3. Summary of variable importance determined by CART without T790M-like mutations**

| <b>Summary of variable importance</b> |                                 |                         |
|---------------------------------------|---------------------------------|-------------------------|
| <b>Drug</b>                           | <b>Structure function group</b> | <b>Exon-based group</b> |
| Erlotinib                             | 85                              | 3.75                    |
| Gefitinib                             | 90                              | 2.5                     |
| AZD3759                               | 83                              | 4.25                    |
| Sapatinib                             | 77                              | 5.5                     |
| Afatinib                              | 80                              | 5.25                    |
| Dacomitinib                           | 83                              | 4.25                    |
| Neratinib                             | 51                              | 12.25                   |
| Poziotinib                            | 23                              | 19.25                   |
| Tarlox-TKI                            | 82                              | 4.5                     |
| CLN-081                               | 84                              | 4.25                    |
| AZ5104                                | 73                              | 6.75                    |
| Mobocertinib                          | 73                              | 6.75                    |
| Osimertinib                           | 88                              | 5.5                     |
| Nazartinib                            | 83                              | 4.5                     |
| Olmutinib                             | 85                              | 3.75                    |
| Rociletinib                           | 75                              | 6.5                     |
| Naquotinib                            | 82                              | 4.5                     |
| Lazertinib                            | 73                              | 6.75                    |

**Supplemental Table 4: List of EGFR mutations and assigned subgroups used in manuscript**

| Classical-Like Mutations | PACC Mutations             |                           | Ex20 Loop Insertions       |                     | T790M-like Mutations     |                            |
|--------------------------|----------------------------|---------------------------|----------------------------|---------------------|--------------------------|----------------------------|
|                          |                            |                           | Near-loop                  | Far-loop            | T790M-like-3S            | T790M-like-3R              |
| A702T                    | A750_I759del<br>insPN      | K757M L858R               |                            |                     |                          |                            |
| A763insFQEA              | E709_T710del<br>insD       | K757R                     | A767_V769dup<br>ASV        | H773_V774<br>insNPH | Ex19del<br>T790M         | Ex19del<br>T790M C797S     |
| A763insLQEA              | E709A                      | L718Q                     | A767_S768ins<br>TLA        | H773_V774<br>insAH  | Ex19del<br>T790M L718V   | Ex19del<br>T790M L792H     |
| D761N                    | E709A G719A                | L718Q<br>Ex19del          | S768_D770dup<br>SVD        | H773dupH            | Ex19del<br>T790M G724S   | G724S T790M                |
| E709A L858R              | E709A G719S                | L718Q L858R               | S768_D770dup<br>SVD L858Q  | V774_C775<br>insHV  | G719A T790M              | L718Q T790M<br>L858R T790M |
| E709K L858R              | E709K                      | L718V                     | S768_D770dup<br>SVD R958H  | V774_C775<br>insPR  | G719S T790M              | C797S<br>L858R T790M       |
| E746_A750del<br>A647T    | E709K G719S                | L718V<br>Ex19del          | S768_D770dup<br>SVD V769M  |                     | H773R T790M              | L718Q<br>L858R T790M       |
| E746_A750del<br>L41W     | E736K                      | L718V L858R               | V769_D770ins<br>ASV        |                     | I744_E749del<br>insMKK   | L718V                      |
| E746_A750del<br>R451H    | E746_A750del<br>A647T      | L747_S752del<br>A755D     | V769_D770ins<br>GSV        |                     | L747_K754<br>delinsATSPE |                            |
| Ex19del<br>E746_A750del  | E746_A750del<br>R675W      | L747P                     | V769_D770ins<br>GVV        |                     | L858R T790M<br>L792H     |                            |
| K754E                    | E746_T751del<br>insV S768C | L747S                     | V769_D770ins<br>MASVD      |                     | L858R T790M<br>V843I     |                            |
| L747_E749del<br>A750P    | Ex19del C797S              | L747S L858R               | D770_N771ins<br>NPG        |                     | L858R T790M              |                            |
| L747_T751del<br>L861Q    | Ex19del G796S              | L747S V774M               | D770_N771ins<br>SVD        |                     | S768I T790M              |                            |
| L833F                    | Ex19del L792H              | L858R C797S               | D770del insGY<br>D770_N771 |                     | T790M                    |                            |
| L833V                    | Ex19del T854I              | L858R L792H               | insG<br>D770_N771          |                     |                          |                            |
| L858R                    | G719A                      | L858R T854S               | insY H773Y                 |                     |                          |                            |
| L858R A289V              | G719A D761Y                | N771G                     | N771dupN<br>N771dupN       |                     |                          |                            |
| L858R E709V              | G719A L861Q                | R776C                     | G724S<br>N771_P772ins      |                     |                          |                            |
| L858R L833F              | G719A R776C                | R776H                     | HH<br>N771_P772ins         |                     |                          |                            |
| L858R P100T              | G719A S768I                | E709_T710del<br>insD S22R | SVDNR                      |                     |                          |                            |
| L858R P848L              | G719A S768I                | S752_I759del<br>V769M     | P772_H773ins<br>DNP        |                     |                          |                            |
| L858R R108K              | G719C S768I                | S768I                     |                            |                     |                          |                            |
| L858R R324H              | G719S                      | S768I L858R               |                            |                     |                          |                            |
| L858R R324L              | G719S L861Q                | S768I L861Q               |                            |                     |                          |                            |
| L858R S784F              | G719S S768I                | S768I V769L               |                            |                     |                          |                            |
| L858R S784Y              | G724S                      | S768I V774M<br>T751_I759  |                            |                     |                          |                            |
| L858R T725M              | G724S Ex19del              | delinsN                   |                            |                     |                          |                            |
| L858R V834L              | G724S L858R                | V769L                     |                            |                     |                          |                            |
| L861Q                    | G779F                      | V769M                     |                            |                     |                          |                            |
| L861R                    | I740dupIPVAK               | V774M                     |                            |                     |                          |                            |
| S720P                    |                            |                           |                            |                     |                          |                            |
| S784F                    |                            |                           |                            |                     |                          |                            |
| S811F                    |                            |                           |                            |                     |                          |                            |
| T725M                    |                            |                           |                            |                     |                          |                            |

**Supplemental Table 5: Patient Characteristics**

| Mutation Type  | Exon | EGFR Mutation      | Age (years) | Sex | Tobacco Use (Y/N) | Pack Years | Histo Pathology         | Previous Chemo (Y/N) | TKI         | Stage at diagnosis |
|----------------|------|--------------------|-------------|-----|-------------------|------------|-------------------------|----------------------|-------------|--------------------|
| Classical Like | 19   | E746_A750 A750E    | 73          | M   | Y                 | Unknown    | Adenocarcinoma          | N                    | Erlotinib   | IV                 |
| Classical Like | 21   | L747_T751del L861Q | 59          | F   | Y                 | 5          | Adenocarcinoma          | N                    | Afatinib    | IV                 |
| Classical Like | 21   | L861Q              | 70          | F   | N                 | N/A        | Adenocarcinoma          | N                    | Afatinib    | II                 |
| Classical Like | 21   | L858R E709K        | 59          | F   | Y                 | 10         | Adenocarcinoma          | N                    | Afatinib    | IV                 |
| Classical Like | 21   | L858R P848L        | 74          | M   | N                 | N/A        | Adenocarcinoma          | N                    | Osimertinib | IV                 |
| Classical Like | 18   | L858R T725M        | 52          | F   | N                 | N/A        | Adenocarcinoma          | N                    | Osimertinib | IV                 |
| Classical Like | 21   | L861Q              | 77          | M   | N                 | N/A        | Adenocarcinoma          | N                    | Osimertinib | IV                 |
| Classical Like | 21   | L861Q              | 78          | M   | N                 | N/A        | Adenocarcinoma          | Y                    | Erlotinib   | IV                 |
| Classical Like | 18   | T725M              | 75          | F   | N                 | N/a        | Adenocarcinoma          | Y                    | Gefitinib   | IV                 |
| Classical Like | 18   | A702T              | 62          | M   | Y                 | 47         | Adenocarcinoma          | Y                    | Afatinib    | IV                 |
| Classical Like | 21   | S811F              | 84          | F   | Y                 | 37         | Adenocarcinoma          | Y                    | erlotinib   | IV                 |
| Classical Like | 19   | L747_E749del A750P | 81          | F   | Y                 | 8          | Adenocarcinoma          | N                    | Erlotinib   | I                  |
| Classical Like | 21   | L861Q              | 70          | M   | Y                 | 24         | Adenocarcinoma          | N                    | Erlotinib   | IV                 |
| Classical Like | 21   | L861Q              | 73          | F   | N                 | N/A        | Adenocarcinoma          | N                    | Erlotinib   | I                  |
| Classical Like | 21   | L858R L833F        | 82          | M   | Y                 | 51         | Adenocarcinoma          | Y                    | Erlotinib   | IV                 |
| Classical Like | 18   | L858R E709V        | 60          | M   | N                 | N/A        | Adenocarcinoma          | Y                    | Rociletinib | IV                 |
| Classical Like | 19   | E746_A750del A647T | 56          | M   | N                 | N/A        | Adenocarcinoma          | Y                    | Erlotinib   | IV                 |
| Classical Like | 21   | E709K L858R        | 70          | M   | Y                 | 5          | Adenocarcinoma          | Y                    | Erlotinib   | IV                 |
| Classical Like | 21   | L861Q              | 82          | F   | Y                 | Unknown    | Adenocarcinoma          | N                    | Erlotinib   | IV                 |
| Classical Like | 18   | E709K L858R        | 45          | M   | N                 | N/A        | Adenocarcinoma          | N                    | Rociletinib | IV                 |
| Classical Like | 21   | L861Q              | 60          | M   | Y                 | 90         | Adenocarcinoma          | N                    | Gefitinib   | IV                 |
| Classical Like | 21   | E709K/L858R        | 83          | F   | N                 | N/A        | Adenocarcinoma          | N                    | Afatinib    | IV                 |
| Classical Like | 19   | L747_E749del A750P | 45          | M   | Y                 | 5          | Adenocarcinoma          | Y                    | Osimertinib | III                |
| Classical Like | 21   | L861Q              | 77          | F   | Y                 | 10         | Adenocarcinoma          | N                    | Erlotinib   | IV                 |
| Classical Like | 19   | D761Y              | 74          | M   | Y                 | 35         | Squamous cell carcinoma | Y                    | Afatinib    | IV                 |
| Classical Like | 21   | L858R S784F        | 71          | F   | N                 | N/A        | Adenocarcinoma          | N                    | Osimertinib | IV                 |
| Classical Like | 21   | L858R V834L        | 75          | F   | Y                 | 20         | Adenocarcinoma          | Y                    | Osimertinib | III                |
| Classical Like | 21   | L858R L833V        | 60          | F   | N                 | N/A        | Adenocarcinoma          | Y                    | Osimertinib | IV                 |
| Classical Like | 21   | L861Q              | 71          | F   | N                 | N/A        | Adenocarcinoma          | N                    | Osimertinib | IV                 |
| Classical Like | 18   | E709A L858R        | 69          | M   | N                 | N/A        | Adenocarcinoma          | Y                    | Osimertinib | IV                 |
| Classical Like | 21   | L861Q              | 79          | M   | N                 | N/A        | Adenocarcinoma          | N                    | Osimertinib | IV                 |



|                |    |                          |    |   |         |         |                |   |             |     |
|----------------|----|--------------------------|----|---|---------|---------|----------------|---|-------------|-----|
| Classical Like | 21 | L858R S784Y              | 53 | M | Y       | 15      | Adenocarcinoma | N | Osimertinib | IV  |
| Classical Like | 6  | L858R R324L              | 71 | F | Y       | 32      | Adenocarcinoma | Y | Erlotinib   | IV  |
| Classical Like | 5  | L858R A289V              | 57 | M | N       | N/A     | Adenocarcinoma | N | Erlotinib   | IV  |
| Classical Like | 6  | L858R R324H              | 70 | F | N       | N/A     | Adenocarcinoma | Y | Erlotinib   | IV  |
| Classical Like | 1  | L858R R108K              | 73 | F | N       | N/A     | Adenocarcinoma | N | Erlotinib   | IV  |
| Classical Like | 1  | E746_A750del L41W        | 59 | F | N       | N/A     | Adenocarcinoma | N | Gefitinib   | IV  |
| Classical Like | 1  | L858R P100T              | 65 | M | Y       | 43      | Adenocarcinoma | N | Gefitinib   | IV  |
| Classical Like | 9  | E746_A750del R451H       | 57 | F | N       | N/A     | Adenocarcinoma | N | Erlotinib   | IV  |
| Ex20LoopIns    | 20 | S768_D770dupSVD<br>R958H | 69 | F | Unknown | 1       | Adenocarcinoma | Y | Poziotinib  | I   |
| Ex20LoopIns    | 20 | S768_D770dupSVD<br>V769M | 63 | M | N       | N/A     | Adenocarcinoma | Y | Poziotinib  | IV  |
| Ex20LoopIns    | 20 | S768_D770dupSVD L858Q    | 50 | M | N       | N/A     | Adenocarcinoma | Y | Poziotinib  | IV  |
| Ex20LoopIns    | 20 | Exon 20 insertion        | 63 | F | N       | N/A     | Adenocarcinoma | N | Osimertinib | IV  |
| Ex20LoopIns    | 20 | H773_V774insH            | 60 | M | N       | NA      | Adenocarcinoma | Y | Erlotinib   | IV  |
| Ex20LoopIns    | 20 | A767_v769dupASV          | 61 | F | N       | NA      | Adenocarcinoma | Y | Erlotinib   | IV  |
| Ex20LoopIns    | 20 | D770_N771insG            | 49 | F | N       | NA      | Adenocarcinoma | Y | Afatinib    | IV  |
| Ex20LoopIns    | 20 | N771delinsGY             | 79 | M | N       | NA      | Adenocarcinoma | Y | Erlotinib   | IV  |
| Ex20LoopIns    | 20 | S768_D770dupSVD          | 47 | F | N       | NA      | Adenocarcinoma | N | Erlotinib   | IV  |
| Ex20LoopIns    | 20 | A767_V769dupASV          | 69 | M | Y       | 35      | Adenocarcinoma | Y | Afatinib    | IV  |
| Ex20LoopIns    | 20 | S768_D770dupSVD          | 65 | M | Y       | 0.75    | Adenocarcinoma | N | Erlotinib   | IV  |
| Ex20LoopIns    | 20 | S768_V769delinsIL        | 57 | F | Y       | <5      | Adenocarcinoma | Y | Afatinib    | IV  |
| Ex20LoopIns    | 20 | S768_D770dupSVD          | 56 | F | N       | NA      | Adenocarcinoma | N | Erlotinib   | IV  |
| PACC           | 18 | G719S                    | 65 | F | Y       | 60      | Adenocarcinoma | N | Osimertinib | III |
| PACC           | 18 | G719A S768I              | 47 | M | N       | N/A     | Adenocarcinoma | N | Erlotinib   | IV  |
| PACC           | 18 | G719S S768I              | 43 | F | Y       | 2       | Adenocarcinoma | N | Afatinib    | I   |
| PACC           | 19 | L858R K757M              | 60 | F | Y       | 5       | Adenocarcinoma | N | Erlotinib   | I   |
| PACC           | 18 | G719S L861Q              | 55 | F | Y       | 10      | Adenocarcinoma | Y | Gefitinib   | III |
| PACC           | 18 | G719A                    | 85 | M | Y       | 50      | Adenocarcinoma | N | Afatinib    | IV  |
| PACC           | 18 | G719A                    | 66 | F | Y       | 12      | Adenocarcinoma | N | Osimertinib | IV  |
| PACC           | 19 | L747_S752del A755D       | 62 | F | Y       | 25      | Adenocarcinoma | N | Osimertinib | IV  |
| PACC           | 20 | V769M                    | 89 | M | Y       | 45      | Adenosquamous  | N | Osimertinib | IV  |
| PACC           | 18 | E709_T719del insD        | 78 | F | N       | N/A     | Adenocarcinoma | N | Afatinib    | IV  |
| PACC           | 18 | G719A                    | 62 | M | Y       | 10      | Adenocarcinoma | Y | Erlotinib   | IV  |
| PACC           | 21 | L858R T854S              | 71 | F | Y       | Unknown | Adenosquamous  | N | Afatinib    | IV  |

|      |    |                        |    |   |   |                 |                |   |             |     |
|------|----|------------------------|----|---|---|-----------------|----------------|---|-------------|-----|
| PACC | 18 | G719C S768I            | 70 | F | Y | 15              | Adenocarcinoma | N | Erlotinib   | IV  |
| PACC | 20 | L858R S768I            | 82 | M | Y | 45              | Adenocarcinoma | Y | Afatinib    | III |
| PACC | 20 | L858R S768I            | 85 | F | N | N/A             | Adenocarcinoma | N | Osimertinib | IV  |
| PACC | 18 | G719A                  | 78 | M | Y | 24              | Adenocarcinoma | N | Afatinib    | IV  |
| PACC | 18 | G719S S768I            | 74 | M | N | N/A             | Adenocarcinoma | N | Erlotinib   | IV  |
| PACC | 19 | L858R L747S            | 69 | M | N | N/A             | Adenocarcinoma | N | Erlotinib   | IV  |
| PACC | 20 | E746_T751delinsV S768C | 74 | F | N | N/A             | Adenocarcinoma | N | Erlotinib   | IV  |
| PACC | 18 | E709A G719A            | 74 | M | Y | chewing tobacco | Adenocarcinoma | Y | Afatinib    | IV  |
| PACC | 20 | S752_I759del V769M     | 64 | M | N | N/A             | Adenocarcinoma | Y | Erlotinib   | IV  |
| PACC | 18 | G719S S768I            | 75 | F | N | N/A             | Adenocarcinoma | N | Erlotinib   | IV  |
| PACC | 18 | G719A S768I            | 60 | M | Y | 90              | Adenocarcinoma | Y | Erlotinib   | IV  |
| PACC | 18 | G719A S768I            | 66 | M | N | N/A             | Adenocarcinoma | Y | Pozotinib   | IV  |
| PACC | 18 | G719A S768I            | 66 | M | N | N/A             | Adenocarcinoma | Y | Avitinib    | IV  |
| PACC | 18 | E709_T710delinsD S22R  | 80 | M | Y | 22              | Adenocarcinoma | Y | Afatinib    | I   |
| PACC | 19 | E746_A750del R675W     | 66 | M | N | N/A             | Adenocarcinoma | Y | Erlotinib   | IV  |
| PACC | 18 | G719A                  | 69 | F | N | N/A             | Adenocarcinoma | N | Erlotinib   | IV  |
| PACC | 19 | E736K                  | 59 | F | Y | 14.5            | Adenocarcinoma | Y | Gefitinib   | III |
| PACC | 18 | G719A S768I            | 75 | F | Y | 17              | Adenocarcinoma | Y | Afatinib    | III |
| PACC | 18 | E709_T710delinsD       | 66 | M | N | N/A             | Adenocarcinoma | Y | Afatinib    | III |
| PACC | 18 | G719A                  | 66 | M | Y | 25              | Adenocarcinoma | Y | Afatinib    | III |
| PACC | 18 | G719A                  | 68 | F | Y | 25              | Adenocarcinoma | N | Afatinib    | III |
| PACC | 19 | T751_I759delinsN       | 59 | F | N | N/A             | Adenocarcinoma | Y | Gefitinib   | IV  |
| PACC | 20 | L861Q S768I            | 56 | F | Y | 38              | Adenocarcinoma | Y | Afatinib    | IV  |
| PACC | 19 | L747S V774M            | 49 | F | Y | 15              | Adenocarcinoma | N | Afatinib    | IV  |
| PACC | 20 | G719A R776C            | 52 | F | N | N/A             | Adenocarcinoma | N | Erlotinib   | IV  |
| PACC | 18 | E709K G719S            | 62 | F | N | N/A             | Adenocarcinoma | N | Afatinib    | IV  |
| PACC | 20 | N771G                  | 60 | F | N | N/A             | Adenocarcinoma | N | Pozotinib   | IV  |
| PACC | 18 | G719A                  | 87 | F | Y | 17.5            | Adenocarcinoma | Y | Osimertinib | IV  |
| PACC | 18 | E709K G719S            | 84 | F | N | N/A             | Adenocarcinoma | Y | Afatinib    | IV  |
| PACC | 18 | G719A                  | 67 | M | N | N/A             | Adenosquamous  | N | Afatinib    | III |
| PACC | 20 | G779F                  | 71 | F | Y | 24              | Adenocarcinoma | Y | Afatinib    | IV  |
| PACC | 19 | T751_I759delinsN       | 74 | F | Y | 1               | Adenocarcinoma | Y | Osimertinib | IV  |
| PACC | 19 | L747P                  | 63 | F | N | N/A             | Adenocarcinoma | N | Osimertinib | I   |
| PACC | 18 | G719S S768I            | 62 | M | N | N/A             | Adenocarcinoma | Y | Afatinib    | IV  |

|               |    |                    |    |   |   |     |                         |   |             |    |
|---------------|----|--------------------|----|---|---|-----|-------------------------|---|-------------|----|
| PACC          | 19 | A750_I759delinsPN  | 51 | F | Y | 13  | Squamous cell carcinoma | Y | Osimertinib | IV |
| PACC          | 18 | G719A D761Y        | 67 | F | Y | 32  | Adenocarcinoma          | Y | Osimertinib | II |
| PACC          | 20 | S768I              | 64 | F | Y | 15  | Adenocarcinoma          | N | Afatinib    | IV |
| PACC          | 18 | E709A G719S        | 45 | F | N | N/A | Adenocarcinoma          | N | Afatinib    | IV |
| PACC          | 18 | G719S L861Q        | 66 | M | N | N/A | Adenocarcinoma          | N | Afatinib    | IV |
| PACC          | 18 | G719A              | 68 | F | N | N/A | Adenocarcinoma          | Y | erlotinib   | IV |
| PACC          | 18 | G719A              | 71 | F | N | N/A | Large Neuroendocrine    | N | Afatinib    | IV |
| T790M-like-3S | 18 | G719S T790M        | 62 | F | N | N/A | Adenocarcinoma          | N | Osimertinib | IV |
| T790M-like-3S | 20 | H773R T790M        | 50 | F | N | N/A | Adenocarcinoma          | Y | Osimertinib | IV |
| T790M-like-3S | 18 | G719A T790M        | 60 | F | N | N/A | Adenocarcinoma          | N | Osimertinib | IV |
| T790M-like-3S | 19 | I744_E749delinsMKK | 60 | F | N | N/A | Adenocarcinoma          | N | Osimertinib | IV |

**Supplemental Table 6: Patient Characteristics stratified by EGFR mutation type**

| Clinical factors             | Classical-Like | PACC       | Ex20LoopIns | T790M-like | <i>P</i> <sup>a</sup> |
|------------------------------|----------------|------------|-------------|------------|-----------------------|
| Total n (%)                  | 39 (36)        | 53 (49)    | 13 (12)     | 4 (3)      |                       |
| Age, y, median<br>(range)    | 70 (45-84)     | 66 (43-89) | 61(47-79)   | 60 (50-62) | > 0.9999              |
| < 65                         | 14 (36)        | 20 (38)    | 9 (69)      | 4          |                       |
| >=65                         | 25 (64)        | 33 (62)    | 4 (31)      | 0          |                       |
| Sex n (%)                    |                |            |             |            | 0.3934                |
| Male                         | 19 (49)        | 20 (38)    | 6 (46)      | 0          |                       |
| Female                       | 20 (51)        | 33 (62)    | 7 (54)      | 4          |                       |
| Smoking status n (%)         |                |            |             |            | 0.6733                |
| Smokers                      | 18 (46)        | 28 (53)    | 3 (23)      | 0          |                       |
| Nonsmokers                   | 21 (54)        | 25 (47)    | 9 (69)      | 4          |                       |
| Unknown                      | 0              | 0          | 1 (8)       | 0          |                       |
| Stage n (%)                  |                |            |             |            | 0.1268                |
| I-III                        | 5 (13)         | 14 (26)    | 1 (8)       | 0          |                       |
| IV                           | 34 (87)        | 39 (74)    | 12 (92)     | 4          |                       |
| Histology n (%) <sup>b</sup> |                |            |             |            | > 0.9999              |
| ADC                          | 38 (97)        | 48 (90)    | 13          | 4          |                       |
| SCC                          | 1 (3)          | 1 (2)      | 0           | 0          |                       |
| ASC                          | 0              | 3 (6)      | 0           | 0          |                       |
| LCNEC                        | 0              | 1 (2)      | 0           | 0          |                       |

The associations of EGFR mutation type with clinical variables were evaluated by Fisher's exact test. Statistical significance was considered for  $p < 0.05$  and all tests were two-tailed.

<sup>a</sup>Comparison between Classical Like and PACC

<sup>b</sup>Comparison between ADC and SCC

**Supplemental Table 7: EGFR mutant vectors used to generate cell lines**

| <b>EGFR Mutation</b>      | <b>Starting Vector</b> | <b>Genomic change</b>              | <b>Manufacturer</b> | <b>Purchased / Created</b> |
|---------------------------|------------------------|------------------------------------|---------------------|----------------------------|
| Ex19del<br>(E746_A750del) | N/A                    | N/A                                | Addgene #32062      | Purchased                  |
| WT                        | N/A                    | N/A                                | Addgene #11011      | Purchased                  |
| L858R                     | N/A                    | N/A                                | Addgene #11012      | Purchased                  |
| G719S                     | N/A                    | N/A                                | Addgene #11013      | Purchased                  |
| D770insNPG                | N/A                    | N/A                                | Addgene #11016      | Purchased                  |
| A767insASV                | N/A                    | N/A                                | Addgene #32066      | Purchased                  |
| L861Q                     | N/A                    | N/A                                | Addgene #32068      | Purchased                  |
| T790M                     | N/A                    | N/A                                | Addgene #32070      | Purchased                  |
| Ex19del T790M             | N/A                    | N/A                                | Addgene #32072      | Purchased                  |
| L858R/T790M               | N/A                    | N/A                                | Addgene #32073      | Purchased                  |
| A763insFQEA               | EGFR WT                | c.2290_2291insTCCA<br>GGAAGCCT     | Bioinnovatise       | Created                    |
| A767insTLA                | EGFR WT                | c.2302_2303insCGCT<br>GGCCA        | Bioinnovatise       | Created                    |
| D770del insGY             | EGFR WT                | c.2308_2309insGTT                  | Bioinnovatise       | Created                    |
| D770insG                  | EGFR WT                | c.2310_2311insGGT                  | Bioinnovatise       | Created                    |
| D770insY H773Y            | EGFR WT                | c.2310_2311insTAC<br>and c.2317C>T | Bioinnovatise       | Created                    |
| Ex19del C797S             | EGFR Ex19del           | c.2386, T>A                        | Bioinnovatise       | Created                    |
| Ex19del L718Q             | EGFR Ex19del           | c.2153T>A                          | Bioinnovatise       | Created                    |
| Ex19del L718V             | EGFR Ex19del           | c.2152C>G                          | Bioinnovatise       | Created                    |
| Ex19del L792H             | EGFR Ex19del           | c.2375T>A                          | Bioinnovatise       | Created                    |
| Ex19del T790M C797S       | EGFR Ex19del T790M     | c.2386, T>A                        | Bioinnovatise       | Created                    |
| Ex19del T790M G724S       | EGFR Ex19del T790M     | c.2313_2314insAAC                  | Bioinnovatise       | Created                    |
| Ex19del T790M L718V       | EGFR Ex19del T790M     | c.2152C>G                          | Bioinnovatise       | Created                    |
| Ex19del T790M L792H       | EGFR Ex19del T790M     | c.2375T>A                          | Bioinnovatise       | Created                    |
| G719A                     | EGFR WT                | c.2156G>C                          | Bioinnovatise       | Created                    |
| G719A L861Q               | EGFR G719A             | c.2582T>A                          | Bioinnovatise       | Created                    |
| G719A T790M               | EGFR T790M             | c.2156G>C                          | Bioinnovatise       | Created                    |
| H773insAH                 | EGFR WT                | c.2320_2321insCCCA<br>CG           | Bioinnovatise       | Created                    |
| H773insH                  | EGFR WT                | c.2319_2320insCAC                  | Bioinnovatise       | Created                    |
| H773insNPH                | EGFR WT                | c.2319_2320insAACC<br>CCCAC        | Bioinnovatise       | Created                    |
| I740dupIPVAK              | EGFR WT                | c.2214_2231dup                     | Bioinnovatise       | Created                    |
| L858R C797S               | EGFR L858R             | c.2386, T>A                        | Bioinnovatise       | Created                    |
| L858R L792H               | EGFR L858R             | c.2375T>A                          | Bioinnovatise       | Created                    |
| L858R T790M C797S         | EGFR L858R T790M       | c.2386, T>A                        | Bioinnovatise       | Created                    |
| L858R T790M L792H         | EGFR L858R T790M       | c.2375T>A                          | Bioinnovatise       | Created                    |
| L858R V834L               | EGFR L858R             | c.2500G>T                          | Bioinnovatise       | Created                    |
| N771insHH                 | EGFR WT                | c.2314_2315insACCA<br>CC           | Bioinnovatise       | Created                    |
| N771insSVDNR              | EGFR WT                | c.2312_2315ACCC>gc<br>gtggacaaccg  | Bioinnovatise       | Created                    |
| P772insDNP                | EGFR WT                | c.2316_2317ins<br>gacaacccc        | Bioinnovatise       | Created                    |

|                          |                  |                                    |               |         |
|--------------------------|------------------|------------------------------------|---------------|---------|
| S768dupSVD               | EGFR WT          | c.2303_2304dupAGCG<br>TGGAC        | Bioinnovatise | Created |
| S768I                    | EGFR WT          | c.2303G>T                          | Bioinnovatise | Created |
| S768I T790M              | EGFR S768I       | c.2369C>T                          | Bioinnovatise | Created |
| V769insASV               | EGFR WT          | c.2308_2309insCCAG<br>CGTGG        | Bioinnovatise | Created |
| V769insGSV               | EGFR WT          | c.2308_2309insGCAG<br>CGTGG        | Bioinnovatise | Created |
| V769insGVV               | EGFR WT          | c.2308_2309insGGGT<br>CGTGG        | Bioinnovatise | Created |
| V769insMASVD             | EGFR WT          | c.2307_2308ins<br>atgccagcgtggac   | Bioinnovatise | Created |
| V769L                    | EGFR WT          | c.2305G>T                          | Bioinnovatise | Created |
| V774insHV                | EGFR WT          | c.2321_2322insCCAC<br>GT           | Bioinnovatise | Created |
| V774insPR                | EGFR WT          | c.2322_2323insCCAC<br>GT           | Bioinnovatise | Created |
| A763insLQEA              | EGFR WT          | c.2289_2290insCTCC<br>AGGAAGCC     | GeneScript    | Created |
| D761N                    | EGFR WT          | c.2281G>A                          | GeneScript    | Created |
| E709_T710del insD        | EGFR WT          | c.2127_2129del                     | GeneScript    | Created |
| E709A                    | EGFR WT          | c.2126A>C                          | GeneScript    | Created |
| E709A G719S              | EGFR G719S       | c.2126A>C                          | GeneScript    | Created |
| E709K                    | EGFR WT          | c.2125G>A                          | GeneScript    | Created |
| E709K G719S              | EGFR G719S       | c.2125G>A                          | GeneScript    | Created |
| E709K L858R              | EGFR L858R       | c.2125G>A                          | GeneScript    | Created |
| Ex19del G724S            | EGFR Ex19del     | c.2313_2314insAAC                  | GeneScript    | Created |
| Ex19del G796S            | EGFR Ex19del     | c.2386G>A                          | GeneScript    | Created |
| Ex19del T854I            | EGFR Ex19del     | c.2561C>T                          | GeneScript    | Created |
| G719A/R776C              | EGFR G719A       | c.2326C>T                          | GeneScript    | Created |
| G724S                    | EGFR WT          | c.2170G>A                          | GeneScript    | Created |
| G724S T790M              | EGFR T790M       | c.2313_2314insAAC                  | GeneScript    | Created |
| K754E                    | EGFR WT          | c.2260A>G                          | GeneScript    | Created |
| K757R                    | EGFR WT          | c.2270A>G                          | GeneScript    | Created |
| L718Q                    | EGFR WT          | c.2153T>A                          | GeneScript    | Created |
| L718Q T790M              | EGFR T790M       | c.2153T>A                          | GeneScript    | Created |
| L718V                    | EGFR WT          | c.2152C>G                          | GeneScript    | Created |
| L747_K754del<br>insATSPE | EGFR WT          | c.2239_2260delinsGC<br>AACATCTCCGG | GeneScript    | Created |
| L747P                    | EGFR WT          | c.2239_2240TT>CC                   | GeneScript    | Created |
| L747S                    | EGFR WT          | c.2240T>C                          | GeneScript    | Created |
| L833F                    | EGFR WT          | c.2499G>T                          | GeneScript    | Created |
| L833V                    | EGFR WT          | c.2497T>G                          | GeneScript    | Created |
| L858R G724S              | EGFR L858R       | c.2313_2314insAAC                  | GeneScript    | Created |
| L858R G796S              | EGFR L858R       | c.2386G>A                          | GeneScript    | Created |
| L858R L718Q              | EGFR L858R       | c.2153T>A                          | GeneScript    | Created |
| L858R L718V              | EGFR L858R       | c.2152C>G                          | GeneScript    | Created |
| L858R S784F              | EGFR L858R       | c.2351C>T                          | GeneScript    | Created |
| L858R T790M L718Q        | EGFR L858R T790M | c.2153T>A                          | GeneScript    | Created |
| L858R T790M L718V        | EGFR L858R T790M | c.2152C>G                          | GeneScript    | Created |

|                   |                  |                   |            |         |
|-------------------|------------------|-------------------|------------|---------|
| L858R T790M V843I | EGFR L858R T790M | c.2527G>A         | GeneScript | Created |
| L861R             | EGFR WT          | c.2582T>G         | GeneScript | Created |
| N771dupN G724S    | EGFR G724S       | c.2313_2314insAAC | GeneScript | Created |
| R776C             | EGFR WT          | c.2326C>T         | GeneScript | Created |
| R776H             | EGFR WT          | c.2327G>A         | GeneScript | Created |
| S720P             | EGFR WT          | c.2158T>C         | GeneScript | Created |
| S768dupSVD V769M  | EGFR S768dupSVD  | c.2305G>A         | GeneScript | Created |
| S768I V769L       | EGFR S768I       | c.2305G>T         | GeneScript | Created |
| S768I V774M       | EGFR S768I       | c.2320G>A         | GeneScript | Created |
| S784F             | EGFR WT          | c.2351C>T         | GeneScript | Created |
| S811F             | EGFR WT          | c.2432C>T         | GeneScript | Created |
| T725M             | EGFR WT          | c.2174C>T         | GeneScript | Created |
| V774M             | EGFR WT          | c.2320G>A         | GeneScript | Created |
